# Supplementary material for: Multi-channel MRI segmentation of eye structures and tumors using patient-specific features
Source: PLoS One. 2017 Mar 28;12(3):e0173900. doi: 10.1371/journal.pone.0173900 (PMC5369682; doi:10.1371/journal.pone.0173900)
Supplement: S1 Table — Complete results comparing HM vs. PM vs. CM. Additional details about the classificacion performance for all 4 experiments (RF-STD, RF-EPSF, CNN-EPSF and CNN-STD) and for all patients. (XLSX) [file pone.0173900.s003.xlsx]

## Sheet: ASM_PM_vs_PathoPat
	Sclera	VH	Lens	Average - Pathological Model (PM)
Sub01	0.90304	0.879102	0.815782	0.865975
Sub02	0.930273	0.941397	0.84119	0.904287
Sub03	0.973322	0.971914	0.885701	0.943646
Sub04	0.953202	0.963289	0.766088	0.894193
Sub05	0.957375	0.94571	0.829363	0.910816
Sub06	0.946449	0.939394	0.901395	0.929079
Sub07	0.93917	0.937074	0.869899	0.915381
Sub08	0.953202	0.963289	0.766088	0.894193
Sub09	0.950764	0.93897	0.834317	0.908017
Sub10	0.964639	0.953342	0.868728	0.928903
Sub11	0.964801	0.959533	0.874879	0.933071
Sub12	0.910516	0.900331	0.933226	0.914691
Sub13	0.934522	0.941457	0.885529	0.920503
Sub14	0.956711	0.954149	0.849265	0.920042
Sub15	0.947005	0.935084	0.878683	0.920257
Sub16	0.954504	0.956253	0.908371	0.939709
	0.946218	0.942518	0.856782
	0.0190107	0.0236344	0.0468814
		Average	0.915173
			0.0149364

## Sheet: ASM_HM_vs_PathoPat
	Sclera	VH	Lens	Average - Healthy Model (HM)
Sub01	0.803499	0.7758	0.155479	0.578259
Sub02	0.878819	0.900978	0.696577	0.825458
Sub03	0.885611	0.880251	0.497636	0.754499
Sub04	0.889695	0.869154	0.821894	0.860248
Sub05	0.916554	0.927492	0.895875	0.913307
Sub06	0.920837	0.925263	0.877545	0.907882
Sub07	0.927092	0.946712	0.864881	0.912895
Sub08	0.931757	0.924648	0.660154	0.838853
Sub09	0.94191	0.926945	0.653197	0.840684
Sub10	0.942068	0.936902	0.887112	0.922027
Sub11	0.947564	0.943583	0.864891	0.918679
Sub12	0.953327	0.938432	0.911715	0.934491
Sub13	0.954355	0.935316	0.867409	0.919027
Sub14	0.955277	0.957239	0.884758	0.932425
Sub15	0.955848	0.943379	0.858553	0.91926
Sub16	0.96006	0.92737	0.918339	0.935256
	0.922767	0.916217	0.769751
	0.0413119	0.0442438	0.202868
		Average	0.869578
			0.0924396

## Sheet: ASM_CM_vs_PathoPat
	Sclera	VH	Lens	Average - Combined Model (CM)		Healthy Model (HM)	Pathological Model (PM)
Sub01	0.875348	0.84171	0.453072	0.723377		0.578259	0.865975
Sub02	0.858918	0.881935	0.605543	0.782132		0.825458	0.904287
Sub03	0.947809	0.949323	0.892791	0.929974		0.754499	0.943646
Sub04	0.949649	0.955777	0.664662	0.856696		0.860248	0.894193
Sub05	0.95706	0.928612	0.901961	0.929211		0.913307	0.910816
Sub06	0.932475	0.944823	0.893689	0.923662		0.907882	0.929079
Sub07	0.95075	0.912211	0.802113	0.888358		0.912895	0.915381
Sub08	0.956144	0.93127	0.886616	0.924677		0.838853	0.894193
Sub09	0.88643	0.877719	0.875774	0.879974		0.840684	0.908017
Sub10	0.92405	0.911303	0.840445	0.891933		0.922027	0.928903
Sub11	0.94294	0.942008	0.887834	0.924261		0.918679	0.933071
Sub12	0.919386	0.918231	0.90042	0.912679		0.934491	0.914691
Sub13	0.944697	0.928131	0.866943	0.913257		0.919027	0.920503
Sub14	0.90366	0.907896	0.784353	0.865303		0.932425	0.920042
Sub15	0.925942	0.95189	0.852604	0.910145		0.91926	0.920257
Sub16	0.916773	0.913733	0.567764	0.799423		0.935256	0.939709
	0.924502	0.918536	0.792286
	0.0299183	0.0307479	0.140815
						T-Test (p)
		Average	0.878441			CM vs. HM	CM vs PM	HM vs. PM
			0.0637878			0.648212	0.0144449	0.0425218

## Sheet: PlosOne_Results_DSC
			BEFORE Graph Cut (GC)					After Graph Cut (GC)
	# of Voxels (Size)		RF+EPSF	RF+STD	CNN+EPSF	CNN+STD		RF+EPSF	RF+STD	CNN+EPSF	CNN+STD
	314	Sub01	0.178796	0.0336424	0.57485	0.408551		0.4	0.0442423	0.379747	0.244444
	1986	Sub02	0.381018	0.226792	0.596392	0.819258		0.74	0.313402	0.679588	0.824831
	20	Sub03	0.0108077	0.0016299	0.0557276	0		0	0	0.216216	0
	223	Sub04	0.114815	0.0500859	0.237168	0.527536		0.25	0.0254958	0.48	0.482993
	16424	Sub05	0.656702	0.563197	0.824909	0.585114		0.73	0.534135	0.824498	0.678412
	10732	Sub06	0.69197	0.642761	0.770865	0.462357		0.79	0.669197	0.759254	0.566094
	17981	Sub07	0.6633	0.549066	0.882224	0.493564		0.8	0.809069	0.882824	0.461025
	179	Sub08	0.0113674	0.011919	0.567164	0.481328		0.11	0	0.57647	0.478992
	253	Sub09	0.094499	0.101914	0.443743	0.638003		0.77	0.748441	0.705479	0.808824
	330	Sub10	0.339155	0.128083	0.287311	0.716208		0.86	0.776957	0.389897	0.826953
	21	Sub11	0	0	0	0		0	0	0	0
	721	Sub12	0.333569	0.239494	0.839011	0.752683		0.69	0.616659	0.860742	0.858696
	317	Sub13	0.5	0.321429	0.763514	0.551867		0.74	0.809969	0.763766	0.800705
	2936	Sub14	0.7571	0.441455	0.869012	0.772727		0.88	0.871786	0.877248	0.77723
	2080	Sub15	0.753068	0.460212	0.870806	0.754818		0.92	0.8125	0.875706	0.76257
	1186	Sub16	0.300692	0.147717	0.517128	0.623835		0.68	0.352708	0.68962	0.652106
		Average	0.361679	0.244962	0.568739	0.536741		0.585	0.461535	0.622566	0.576492
		Std Dev	0.278518	0.222544	0.293487	0.242965		0.320728	0.34881	0.262765	0.283543
